# Supplementary material for: Effects of phosphorus-solubilizing fungi on bulb quality and the Fritillaria taipaiensis rhizosphere soil environment
Source: PeerJ. 2025 Apr 21;13:e19283. doi: 10.7717/peerj.19283 (PMC12020734; doi:10.7717/peerj.19283)
Supplement: Supplemental Information 1 [file peerj-13-19283-s001.xlsx]

## Sheet: Bulb fresh weight, dry weight
	Total fresh weight before planting/g	Total fresh weight after planting/g	total dry weight/g	No. of pots/pot	Gross weight gain/g	Biomass/%	Water content/%		Weight of dry soil g (1g of fresh soil)
Z1	9.4754	12.1728	3.8873	8	2.6974	0.2847	0.6807		CK*	0.7825
Z2	9.9037	12.9366	3.9734	8	3.0329	0.3062	0.6929		CK0	0.7433
Z3	9.6318	12.5259	3.8793	8	2.8941	0.3005	0.6903		Z1	0.9515
Z12	9.5762	11.9241	3.5355	8	2.3479	0.2452	0.7035		Z2	0.8117
Z13	9.8763	15.8126	4.7979	8	5.9363	0.6011	0.6966		Z3	0.8101
Z23	10.1577	19.522	6.0919	8	8.3643	0.7496	0.6879		Z12	0.8344
Z123	10.0342	18.7311	5.7588	8	8.6969	0.8667	0.6926		Z13	0.8397
CK	3.7351	4.6249	1.3676	3	0.8898	0.2382	0.7043		Z23	0.8263
									Z123	0.8154

## Sheet: Number of soil microorganisms
	bacteria	Actinomyces	phospholytic fungi	fungi
1	17.5	4.75	7	15
1	27.5	5.45	19	13.5
1	21	5.5	13.5	15
2	18.5	2.25	9.5	8
2	21.5	2.65	15	15.5
2	23	2.45	7	12.5
3	33	2.75	7.5	8.5
3	36.5	3.4	7.5	9.5
3	40.5	2.35	3.5	8
4	15	5.4	13.5	18
4	18	4.9	14	19
4	19	5.65	10	13
5	18.5	12.2	7.5	9.5
5	14.5	12.3	8	9.5
5	14.5	11.25	6	7
6	27.5	22	7.5	9.5
6	41	24.5	6.5	13.5
6	32.5	26.5	3.5	6.5
7	22.2	16.5	3	4.5
7	28.05	17	2.5	4
7	24.75	15	3	4.5
8	7.5	7.75	11	19
8	8.35	7.8	9	10.5
8	6.95	6.3	11	18.5

## Sheet: Microbiological data
Description	Bacteria										Number	Bacteria/106CFU/g	Actinomycetes/106CFU/g	Phosphorus-Solubilizing Fungi/103CFU/g	Fungi103CFU/g
VAR00002	Description										Z1	22.000±2.930bc	5.233±0.419e	13.167±3.468a	14.500±0.866ab
	VAR00002										Z2	21.000±1.323bc	2.450±0.200f	10.500±2.362abc	12.000±3.775abc
		Case Number	Mean	Standard Deviation	Standard Error	95% Confidence Interval for the Mean		Minimum Value	Maximum Value		Z3	36.667±2.167a	2.833±0.530f	6.167±1.333cd	8.667±0.764cd
						Lower Limit	Upper Limit				Z12	17.333±1.202c	5.316±0.382e	12.500±1.258ab	16.667±3.215a
Z1	1	3	22	5.07445	2.92973	9.3944	34.6056	17.5	27.5		Z13	15.833±1.333c	11.917±0.580c	7.167±0.601bcd	8.667±1.442cd
Z2	2	3	21	2.29129	1.32288	15.3081	26.6919	18.5	23		Z23	33.667±3.940a	24.333±2.255a	5.833±1.202cd	9.833±3.512bc
Z3	3	3	36.6667	3.75278	2.16667	27.3443	45.9891	33	40.5		Z123	25.000±0.350b	16.167±1.041b	2.833±0.167d	4.333±0.289d
Z12	4	3	17.3333	2.08167	1.20185	12.1622	22.5045	15	19		CK	7.600±0.705d	7.283±0.852d	10.333±0.667abc	16.000±4.770a
Z13	5	3	15.8333	2.3094	1.33333	10.0965	21.5702	14.5	18.5
Z23	6	3	33.6667	6.8252	3.94053	16.7119	50.6214	27.5	41
Z123	7	3	25	2.933	1.69337	17.714	32.286	22.2	28.05			36.667	24.333	13.167
CK	8	3	7.6	0.70534	0.40723	5.8478	9.3522	6.95	8.35			7.6	7.283	10.333
	Total	24	22.3875	9.56085	1.9516	18.3503	26.4247	6.95	41			3.82461	2.34107	0.274267
	1	3		22	22		bc				Number	Bacteria/106CFU/g	Actinomycetes/106CFU/g	Phosphorus-Solubilizing Fungi/103CFU/g	Fungi103CFU/g
	2	3		21	21		bc				Z1	22.000±2.930bc	5.233±0.419e	13.167±3.468a	14.500±0.866ab
	3	3				36.6667	a				Z2	21.000±1.323bc	2.450±0.200f	10.500±2.362abc	12.000±3.775abc
	4	3		17.3333			c				Z3	36.667±2.167a	2.833±0.530f	6.167±1.333cd	8.667±0.764cd
	5	3		15.8333			c				Z12	17.333±1.202c	5.316±0.382e	12.500±1.258ab	16.667±3.215a
	6	3				33.6667	a				Z13	15.833±1.333c	11.917±0.580c	7.167±0.601bcd	8.667±1.442cd
	7	3			25		b				Z23	33.667±3.940a	24.333±2.255a	5.833±1.202cd	9.833±3.512bc
Duncan's new multiple range test	8	3	7.6				d				Z123	25.000±0.350b	16.167±1.041b	2.833±0.167d	4.333±0.289d
	VAR00001	Case Number	Alpha's subset = 0.05								CK	7.600±0.705d	7.283±0.852d	10.333±0.667abc	16.000±4.770a
VAR00002
			1	2	3	4
			d	c	b	a					编号	Bacteria/106CFU/g
											Z1	22	2.93	bc
											Z2	21	1.323	bc
											Z3	36.667	2.167	a
											Z12	17.333	1.202	c
Description	Actinomyces										Z13	15.833	1.333	c
VAR00002	Description										Z23	33.667	3.94	a
	VAR00002										Z123	25	0.35	b
		Case Number	Mean	Standard Deviation	Standard Error	95% Confidence Interval for the Mean		Minimum Value	Maximum Value		CK	7.6	0.705	d
						Lower Limit	Upper Limit					Actinomycetes/106CFU/g
	1	3	5.2333	0.41932	0.2421	4.1917	6.275	4.75	5.5			5.233	0.419	e
	2	3	2.45	0.2	0.11547	1.9532	2.9468	2.25	2.65			2.45	0.2	f
	3	3	2.8333	0.52994	0.30596	1.5169	4.1498	2.35	3.4			2.833	0.53	f
	4	3	5.3167	0.38188	0.22048	4.368	6.2653	4.9	5.65			5.316	0.382	e
	5	3	11.9167	0.57951	0.33458	10.4771	13.3563	11.25	12.3			11.917	0.58	c
	6	3	24.3333	2.25462	1.30171	18.7325	29.9341	22	26.5			24.333	2.255	a
	7	3	16.1667	1.04083	0.60093	13.5811	18.7522	15	17			16.167	1.041	b
	8	3	7.2833	0.85196	0.49188	5.167	9.3997	6.3	7.8			7.283	0.852	d
	Total	24	9.4417	7.31554	1.49328	6.3526	12.5307	2.25	26.5			Phosphorus-Solubilizing Fungi/103CFU/g
												13.167	3.468	a
												10.5	2.362	abc
												6.167	1.333	cd
												12.5	1.258	ab
												7.167	0.601	bcd
	VAR00001	Case Number	Alpha's subset = 0.05									5.833	1.202	cd
			1	2	3	4	5	6				2.833	0.167	d
	1	3		5.2333					e			10.333	0.667	abc
Duncan's new multiple range test	2	3	2.45						f			Fungi103CFU/g
	3	3	2.8333						f			14.5	0.866	ab
	4	3		5.3167					e			12	3.775	abc
	5	3				11.9167			c			8.667	0.764	cd
	6	3						24.3333	a			16.667	3.215	a
	7	3					16.1667		b			8.667	1.442	cd
	8	3			7.2833				d			9.833	3.512	bc
	statistically significant		0.642	0.919	1	1	1	1				4.333	0.289	d
a Using the reconciled mean sample size = 3.000.												16	4.77	a
			f	e	d	c	b	a
Description	phospholytic fungi
VAR00002	Description
		Case Number	Mean	Standard Deviation	Standard Error	95% Confidence Interval for the Mean		Minimum Value	Maximum Value
						Lower Limit	Upper Limit
	1	3	13.1667	6.00694	3.46811	-1.7554	28.0887	7	19
	2	3	10.5	4.09268	2.36291	0.3332	20.6668	7	15
	3	3	6.1667	2.3094	1.33333	0.4298	11.9035	3.5	7.5
	4	3	12.5	2.17945	1.25831	7.0859	17.9141	10	14
	5	3	7.1667	1.04083	0.60093	4.5811	9.7522	6	8
	6	3	5.8333	2.08167	1.20185	0.6622	11.0045	3.5	7.5
	7	3	2.8333	0.28868	0.16667	2.1162	3.5504	2.5	3
	8	3	10.3333	1.1547	0.66667	7.4649	13.2018	9	11
	Total	24	8.5625	4.24344	0.86619	6.7707	10.3543	2.5	19
	VAR00001	Case Number	Alpha's subset = 0.05
	1	3				13.1667	a
	2	3		10.5	10.5	10.5	abc
	3	3	6.1667	6.1667			cd
	4	3			12.5	12.5	ab
	5	3	7.1667	7.1667	7.1667		bcd
	6	3	5.8333	5.8333			cd
Duncan's new multiple range test	7	3	2.8333				d
	8	3		10.3333	10.3333	10.3333	abc
VAR00002
			1	2	3	4
			d	c	b	a
Description	fungi
VAR00002
		Case Number	Mean	Standard Deviation	Standard Error	95% Confidence Interval for the Mean		Minimum Value	Maximum Value
						Lower Limit	Upper Limit
	1	3	14.5	0.86603	0.5	12.3487	16.6513	13.5	15
	2	3	12	3.77492	2.17945	2.6226	21.3774	8	15.5
	3	3	8.6667	0.76376	0.44096	6.7694	10.564	8	9.5
	4	3	16.6667	3.21455	1.85592	8.6813	24.6521	13	19
	5	3	8.6667	1.44338	0.83333	5.0811	12.2522	7	9.5
	6	3	9.8333	3.51188	2.02759	1.1093	18.5573	6.5	13.5
	7	3	4.3333	0.28868	0.16667	3.6162	5.0504	4	4.5
	8	3	16	4.7697	2.75379	4.1514	27.8486	10.5	19
	总计	24	11.3333	4.68501	0.95632	9.355	13.3116	4	19
	1	3			14.5	14.5	ab
	2	3		12	12	12	abc
	3	3	8.6667	8.6667			cd
	4	3				16.6667	a
	5	3	8.6667	8.6667			cd
	6	3		9.8333	9.8333		bc
Duncan's new multiple range test	7	3	4.3333				d
	8	3				16	a
	VAR00001	Case Number	Alpha's subset = 0.05
VAR00002
			1	2	3	4
			d	c	b	a

## Sheet:  total phosphorus
		Sample Weight	OD660	Phosphorus Content ppm	Total Phosphorus in Soil /%/%	mg/g			Abs
Z1	1	1.0002	0.835	2.48818	0.248768		0	0	0.074
	2	1	0.779	2.2905	0.22905		1	0.2	0.125
	3	1.0001	0.808	2.39287	0.239263		3	0.6	0.247
Z2	1	1.0002	0.838	2.49876	0.249826		5	1	0.341
	2	1.0002	0.714	2.06107	0.206065		7	1.4	0.452
	3	1.0001	0.765	2.24109	0.224086		9	1.8	0.579
Z3	1	1.0004	0.799	2.3611	0.236016		11	2.2	0.689
	2	1.0001	0.803	2.37522	0.237498		13	2.6	0.809
	3	1.0002	0.784	2.30815	0.230769		15	3	0.923
Z12	1	1.0005	0.766	2.24462	0.22435
	2	1.0003	0.785	2.31168	0.231099	23.1
	3	1.0002	0.791	2.33286	0.23324
Z13	1	1.0004	0.76	2.22344	0.222255
	2	1.0002	0.827	2.45994	0.245944
	3	1.0002	0.797	2.35404	0.235357
Z23	1	1.0001	0.847	2.53053	0.253028
	2	1	0.818	2.42817	0.242817
	3	1.0001	0.823	2.44582	0.244557
Z123	1	1.0003	0.802	2.37169	0.237098
	2	1.0003	0.94	2.85881	0.285795
	3	1.0004	0.854	2.55524	0.255422
ZCK	1	1.0004	0.644	1.81398	0.181325
	2	1.0001	0.682	1.94811	0.194792
	3	1.0003	0.657	1.85987	0.185931
空白	1		0.065
	2		0.059
	3		0.063
			0.0623333
Description
VAR00002
	Case Number	Mean	Standard Deviation	Standard Error	95% Confidence Interval for the Mean		Minimum Value	Maximum Value
					Lower Limit	Upper Limit
Z1	3	0.239	0.01	0.00577	0.2142	0.2638	0.23	0.25		Z1	0.239±0.010ab
Z2	3	0.2267	0.02212	0.01277	0.1717	0.2816	0.21	0.25		Z2	0.227±0.022b
Z3	3	0.2347	0.00321	0.00186	0.2267	0.2427	0.23	0.24		Z3	0.235±0.003ab
Z12	3	0.2293	0.00473	0.00273	0.2176	0.2411	0.22	0.23		Z12	0.229±0.005b
Z13	3	0.2343	0.01201	0.00694	0.2045	0.2642	0.22	0.25		Z13	0.234±0.012ab
Z23	3	0.247	0.00529	0.00306	0.2339	0.2601	0.24	0.25		Z23	0.247±0.005ab
Z123	3	0.2593	0.02479	0.01431	0.1978	0.3209	0.24	0.29		Z123	0.259±0.025a
Zck	3	0.1873	0.00709	0.0041	0.1697	0.205	0.18	0.2		CK	0.187±0.007c
Total	24	0.2322	0.02295	0.00468	0.2225	0.2419	0.18	0.29
	1	3		0.239	0.239	ab
	2	3		0.2267		b
	3	3		0.2347	0.2347	ab
	4	3		0.2293		b
	5	3		0.2343	0.2343	ab
	6	3		0.247	0.247	ab
	7	3			0.2593	a
Duncan's new multiple range test	8	3	0.1873			c
	VAR00001	Case Number	Alpha's subset = 0.05
	statistically significant		1	0.118	0.056
VAR00002
			1	2	3
Will display the average values of each group in the homogeneous subset.
a Using harmonic mean sample size = 3.000.

## Sheet: available phosphorus
		Sample Weightg	A-P	Colorimetric Solutionmg/L	Soil A-P mg/kg									V	C ug/ml	OD
Z1	1	1.0004	1.135	1.12732	67.6124									0	0	0.059
	2	1.0004	1.151	1.14535	68.6936
	3	1.0003	1.164	1.16	69.5791									1	0.1	0.128
Z2	1	1.0007	1.086	1.07211	64.2818									2	0.2	0.225
	2	1.0001	1.29	1.30197	78.1105
	3	1.0005	1.303	1.31662	78.9577									3	0.3	0.311
Z3	1	1.0001	1.248	1.25465	75.2713									4	0.4	0.397
	2	1.0002	1.133	1.12507	67.4907
	3	1.0006	1.079	1.06423	63.8152									5	0.5	0.482
Z12	1	1.0008	1.111	1.10028	65.9641									6	0.6	0.594
	2	1.0003	1.144	1.13746	68.2274
	3	1.0002	1.17	1.16676	69.9916
Z13	1	1.0008	1.44	1.47099	88.1886
	2	1.0002	1.24	1.24563	74.7231
	3	1.0003	1.314	1.32901	79.7169
Z23	1	1.0006	1.378	1.40113	84.0172
	2	1.0003	1.551	1.59606	95.7347
	3	1.0007	1.628	1.68282	100.898
Z123	1	1.0009	1.863	1.94761	116.751
	2	1.0002	1.79	1.86535	111.899
	3	1.0007	1.824	1.90366	114.14
CK	1	1	0.923	0.888451	53.307
	2	1.0008	0.948	0.91662	54.9532
	3	1.0001	0.963	0.933521	56.0057
initial value	1	1.0008	0.895	0.856901	51.373
	2	1.0007	0.835	0.789296	47.3246
	3	1.0003	0.901	0.863662	51.8042
	4	1.0003	0.877	0.934648
15ml system (5ml soil solution + 5ml color reagent + 5ml NaHCO3), no soil solution blank (0.087), all data above are measured after zero adjustment
Dilution factor = 20/5
Description
VAR00002
	Case Number	Mean	Standard Deviation	Standard Error	95% Confidence Interval for the Mean		Minimum Value	Maximum Value
					Lower Limit	Upper Limit
1	3	68.6283	0.98514	0.56877	66.1811	71.0756	67.61	69.58
2	3	73.7833	8.23931	4.75697	53.3157	94.2509	64.28	78.96		Z1	68.628±0.985d
3	3	68.859	5.84924	3.37706	54.3287	83.3893	63.82	75.27		Z2	73.783±8.239cd
4	3	68.061	2.01912	1.16574	63.0452	73.0768	65.96	69.99		Z3	68.859±5.849d
5	3	80.8763	6.80745	3.93028	63.9657	97.787	74.72	88.19		Z12	68.061±2.019d
6	3	93.55	8.65001	4.99409	72.0622	115.038	84.02	100.9		Z13	80.876±6.807c
7	3	114.263	2.42835	1.40201	108.231	120.296	111.9	116.75		Z23	93.550±8.650b
8	3	54.7553	1.36031	0.78538	51.3761	58.1345	53.31	56.01		Z123	114.263±2.428a
9	3	50.1673	2.47095	1.4266	44.0292	56.3055	47.33	51.8		CK	54.755±1.360e
total	27	74.7716	19.3222	3.71855	67.128	82.4151	47.33	116.75		initial value	50.167±2.471e
	1	3		68.6283				d
	2	3		73.7833	73.7833			cd
	3	3		68.859				d
	4	3		68.061				d
	5	3		68.061	80.8763			c
	6	3				93.55		b
	7	3					114.263	a
	8	3	54.7553					e
Duncan's new multiple range test	9	3	50.1673					e
	VAR00001	Case Number	Alpha's subset = 0.05
	statistically significant		0.293	0.23	0.111	1	1
VAR00002
			1	2	3	4	5
Will display the average values of each group in the homogeneous subset.
a Using harmonic mean sample size = 3.000.

## Sheet: available nitrogen
		称样量	消耗标准溶液ml	available nitrogenmg/kg			Description
Z1	1	2.0003	3.4	90.9864			VAR00002
	2	2.0008	3.9	108.457				Case Number	Mean	Standard Deviation	Standard Error	95% Confidence Interval for the Mean		Minimum Value	Maximum Value
	3	2.0005	3.7	101.475								Lower Limit	Upper Limit
Z2	1	2.0005	3.2	83.979			1	3	100.306	8.79397	5.0772	78.4606	122.151	90.99	108.46		100.306±8.794ab
	2	2.0003	3.6	97.9853			2	3	92.1437	7.28632	4.20676	74.0435	110.244	83.98	97.99		92.144±7.286b
	3	2.0007	3.5	94.4669			3	3	96.8107	5.62124	3.24543	82.8467	110.775	92.71	103.22		96.811±5.621b
Z3	1	2.0006	3.75	103.219			4	3	72.8937	11.3937	6.57814	44.5902	101.197	61.23	83.99		72.894±11.394c
	2	2	3.5	94.5			5	3	113.143	10.6754	6.16347	86.6237	139.662	101.49	122.45		113.143±10.675a
	3	2.0008	3.45	92.7129			6	3	96.2287	11.4674	6.62068	67.7422	124.715	85.74	108.47		96.229±11.467b
Z12	1	2.001	2.9	73.4633			7	3	94.477	7.00801	4.04607	77.0681	111.886	87.47	101.49		94.477±7.008b
	2	2.0002	3.2	83.9916			8	3	89.2437	7.62314	4.40122	70.3067	108.181	80.5	94.5		89.244±7.623b
	3	2.0008	2.55	61.2255			total	24	94.4058	13.1177	2.67763	88.8667	99.9449	61.23	122.45
Z13	1	2.0002	3.7	101.49
	2	2.0008	4.3	122.451
	3	2.0002	4.1	115.488
Z23	1	2.0006	3.5	94.4717
	2	2.0005	3.9	108.473				1	3		100.306	100.306	ab
	3	2.0002	3.25	85.7414				2	3		92.1437		b
Z123	1	2.0007	3.5	94.4669				3	3		96.8107		b
	2	2.0006	3.3	87.4738			Duncan's new multiple range test	4	3	72.8937			c
	3	2.0002	3.7	101.49				5	3			113.143	a
ZCK	1	2.0001	3.5	94.4953				6	3		96.2287		b
	2	2.0003	3.45	92.7361				7	3		94.477		b
	3	2	3.1	80.5				8	3		89.2437		b
空白			0.8					VAR00001	Case Number	Alpha's subset = 0.05
			0.8					statistically significant		1	0.196	0.099
							VAR00002
										1	2	3
							Will display the average values of each group in the homogeneous subset.
							a Using harmonic mean sample size = 3.000.

## Sheet: available potassium
		Sample Weight/g	Flame Photometry Value	Standard Solution Concentrationug/ml	Soil Rapidly Available Potassiummg/kg			Calibration Curve
Z1	1	2.0002	149.3	49.0702	490.653	0	0	0
	2	2.0005	150.5	49.601	495.886	2	4	9.7
	3	2.0001	153.9	51.105	511.024	5	10	23.6
Z2	1	2.0003	126.9	39.1618	391.559	10	20	45.7
	2	2.0005	127.5	39.4272	394.173	15	30	69.21
	3	2.0004	129.9	40.4888	404.807	20	40	90.3
Z3	1	2.0007	135.6	43.0101	429.951
	2	2.0004	137.7	43.939	439.303
	3	2.0008	138.3	44.2044	441.868
Z12	1	2.0004	140.5	45.1776	451.686
	2	2.0003	141.4	45.5757	455.689
	3	2.0008	137.5	43.8506	438.33
Z13	1	2.0008	154.1	51.1934	511.73
	2	2.0006	152.4	50.4415	504.263
	3	2.0008	150.6	49.6452	496.254
Z23	1	2.0005	122.2	37.0828	370.735
	2	2.0002	124.6	38.1444	381.406
	3	2.0007	123.1	37.4809	374.678
Z123	1	2.001	130.6	40.7984	407.78
	2	2.0007	139.1	44.5583	445.427
	3	2.0005	130.8	40.8869	408.767
CK	1	2.0008	129.3	40.2234	402.073
	2	2.0004	128.7	39.958	399.5
	3	2.0004	125.6	38.5867	385.79
initial value	1	2.0003	89.6	22.6624	226.591
	2	2.0005	88.5	22.1759	221.703
	3	2.0004	86	21.07	210.658
	4	2.0009	85	20.6277	206.184
			37.75
Description
VAR00002
	Case Number	Mean	Standard Deviation	Standard Error	95% Confidence Interval for the Mean		Minimum Value	Maximum Value
					Lower Limit	Upper Limit				499.188±10.579a
1	3	499.188	10.5792	6.10792	472.907	525.468	490.65	511.02		396.846±7.017d
2	3	396.846	7.01694	4.05123	379.415	414.277	391.56	404.81		437.041±6.272bc
3	3	437.041	6.27235	3.62134	421.459	452.622	429.95	441.87		448.568±9.090b
4	3	448.568	9.08975	5.24797	425.988	471.149	438.33	455.69		504.082±7.740a
5	3	504.082	7.73958	4.46845	484.856	523.308	496.25	511.73		375.606±5.396e
6	3	375.606	5.39573	3.11523	362.203	389.01	370.74	381.41		420.658±21.456c
7	3	420.658	21.4563	12.3878	367.358	473.958	407.78	445.43		395.788±8.753d
8	3	395.788	8.75329	5.05371	374.043	417.532	385.79	402.07		219.651±8.162f
9	3	219.651	8.16236	4.71254	199.374	239.927	210.66	226.59
total	27	410.825	81.5051	15.6857	378.583	443.068	210.66	511.73
	1	3						499.188	a
	2	3			396.846				d
	3	3				437.041	437.041		bc
	4	3					448.568		b
	5	3						504.082	a
	6	3		375.606					e
	7	3				420.658			c
	8	3			395.788				d
Duncan's new multiple range test	9	3	219.651						f
	VAR00001	Case Number	Alpha's subset = 0.05
	statistically significant		1	1	0.902	0.07	0.192	0.572
VAR00002
			1	2	3	4	5	6
Will display the average values of each group in the homogeneous subset.
a Using harmonic mean sample size = 3.000.

## Sheet: organic matter
		Sample Weight/g	Standard Solution Consumed (ml)	Organic Carbon	Organic Matter		Description
Z1	1	0.1253	2.68	38.0531	65.6035		VAR00002
	2	0.1251	2.72	37.476	64.6087			Case Number	Mean	Standard Deviation	Standard Error	95% Confidence Interval for the Mean		Minimum Value	Maximum Value
	3	0.1255	2.64	38.6283	66.5952							Lower Limit	Upper Limit
Z2	1	0.1252	2.94	33.9405	58.5134		1	3	65.6023	0.993	0.57331	63.1356	68.0691	64.61	66.6
	2	0.125	2.75	37.0272	63.8349		2	3	60.5777	2.85443	1.648	53.4869	67.6685	58.51	63.84
	3	0.1251	2.91	34.446	59.385		3	3	58.356	1.31096	0.75688	55.0994	61.6126	56.87	59.33
Z3	1	0.1256	2.92	34.1501	58.8747		4	3	64.7693	2.79531	1.61387	57.8254	71.7133	61.94	67.53
	2	0.1252	3	32.9844	56.8651		5	3	70.8027	4.60173	2.65681	59.3713	82.234	67.75	76.1
	3	0.1258	2.9	34.413	59.3279		6	3	62.7593	0.91236	0.52675	60.4929	65.0258	62.04	63.78
Z12	1	0.1253	2.61	39.1676	67.5249		7	3	74.136	3.23042	1.86509	66.1112	82.1608	70.43	76.37
	2	0.1255	2.81	35.9259	61.9362		8	3	53.751	1.02519	0.59189	51.2043	56.2977	52.83	54.86
	3	0.1257	2.7	37.6146	64.8475		Total	24	63.8443	6.62901	1.35314	61.0451	66.6435	52.83	76.37
Z13	1	0.1254	2.57	39.7727	68.5682
	2	0.1254	2.6	39.2955	67.7454
	3	0.1252	2.3	44.1386	76.0949											Z1	65.602±0.993b
Z23	1	0.1251	2.75	36.9976	63.7839											Z2	60.578±2.854cd
	2	0.125	2.8	36.2292	62.4591											Z3	58.356±1.311d
	3	0.1253	2.81	35.9832	62.0351			1	3				65.6023		b	Z12	64.769±2.795bc
Z123	1	0.1255	2.5	40.8538	70.4319			2	3		60.5777	60.5777			cd	Z13	70.803±4.602a
	2	0.1251	2.32	43.8549	75.6059			3	3		58.356				d	Z23	62.759±0.912bcd
	3	0.1252	2.29	44.2979	76.3696			4	3			64.7693	64.7693		bc	Z123	74.136±3.230a
ZCK	1	0.1252	3.12	31.0723	53.5686			5	3					70.8027	a	CK	53.751±1.025e
	2	0.1254	3.07	31.8182	54.8545			6	3		62.7593	62.7593	62.7593		bcd
	3	0.125	3.15	30.6432	52.8289			7	3					74.136	a
空白			5.07				Duncan's new multiple range test	8	3	53.751					e
								VAR00001	Case Number	Alpha's subset = 0.05	Case Number	Alpha's subset = 0.05
								statistically significant		1	0.061	0.074	0.214	0.129
							VAR00002
										1	2	3	4	5
							Will display the average values of each group in the homogeneous subset.
							a Using harmonic mean sample size = 3.000.

## Sheet: pH value
		称样量g	pH值										min	max
Z1	1	2.0012	7.73												5
	2		7.75			描述							7.73	7.78	4
	3	2.0016	7.78			VAR00002							7.69	7.71	3
Z2	1	2.008	7.71				个案数	平均值	标准 偏差	标准 错误	平均值的 95% 置信区间		7.64	7.72	2
	2		7.71								下限	上限	7.64	7.72	1
	3	2.0048	7.69			1	3	7.7533	0.02517	0.01453	7.6908	7.8158	7.57	7.65	2
Z3	1	2.0076	7.72			2	3	7.7033	0.01155	0.00667	7.6746	7.732	7.73	7.8	3
	2		7.68			3	3	7.68	0.04	0.02309	7.5806	7.7794	7.7	7.81
	3	2.0025	7.64			4	3	7.6867	0.04163	0.02404	7.5832	7.7901	7.44	7.58
Z12	1	2.0059	7.72			5	3	7.6067	0.04041	0.02333	7.5063	7.7071	7.02	7.05
	2		7.7			6	3	7.7633	0.03512	0.02028	7.6761	7.8506	7.02	7.81
	3	2.0024	7.64			7	3	7.7533	0.05508	0.0318	7.6165	7.8901
Z13	1	2.0028	7.57			8	3	7.5067	0.07024	0.04055	7.3322	7.6811	7.7533	ab
	2		7.6			9	3	7.0333	0.01528	0.00882	6.9954	7.0713	7.7033	ab
	3	2.0019	7.65			总计	27	7.6096	0.22466	0.04324	7.5208	7.6985		b
Z23	1	2.0067	7.73										7.6867	ab
	2		7.76											c
	3	2.0086	7.8										7.7633	a
Z123	1	2.0033	7.81										7.7533	ab
	2		7.75											d
	3	2.0023	7.7											e
CK	1	2.0078	7.44				1	3				7.7533
	2		7.5				2	3				7.7033	0.053
	3	2.0083	7.58				3	3				7.68
初始	1	2.007	7.02				4	3				7.6867	5
	3	2.0064	7.05				5	3			7.6067
	4	2.0019	7.03				6	3
							7	3				7.7533
							8	3		7.5067
						邓肯a	9	3	7.0333
							VAR00001	个案数	Alpha 的子集 = 0.05
							显著性		1	1	1	0.063
						VAR00002
									1	2	3	4
						将显示齐性子集中各个组的平均值。
						a 使用调和平均值样本大小 = 3.000。

## Sheet: Summary of soil physico-chemica
NO.	pH Value	Rapidly Available Phosphorus (mg/kg)	Rapidly Available Potassium (mg/kg)	Rapidly Available Nitrogen (mg/kg)	Total Phosphorus (%)	Organic Matter (g/kg)
Z1	7.753±0.025ab	68.628±0.985d	499.188±10.579a	100.306±8.794ab	0.239±0.010ab	65.602±0.993b
Z2	7.703±0.012ab	73.783±8.239cd	396.846±7.017d	92.144±7.286b	0.227±0.022b	60.578±2.854cd
Z3	7.680±0.040b	68.859±5.849d	437.041±6.272bc	96.811±5.621b	0.235±0.003ab	58.356±1.311d
Z12	7.687±0.042ab	68.061±2.019d	448.568±9.090b	72.894±11.394c	0.229±0.005b	64.769±2.795bc
Z13	7.607±0.040c	80.876±6.807c	504.082±7.740a	113.143±10.675a	0.234±0.012ab	70.803±4.602a
Z23	7.763±0.035a	93.550±8.650b	375.606±5.396e	96.229±11.467b	0.247±0.005ab	62.759±0.912bcd
Z123	7.753±0.055ab	114.263±2.428a	420.658±21.456c	94.477±7.008b	0.259±0.025a	74.136±3.230a
CK	7.507±0.070d	54.755±1.360e	395.788±8.753d	89.244±7.623b	0.187±0.007c	53.751±1.025e
初始	7.033±0.015e	50.167±2.471e	219.651±8.162f	/	/	/
NO.	total phosphorus（%）			113.143
Z1	0.239	0.01	ab	89.244
Z2	0.227	0.022	b	0.267794
Z3	0.235	0.003	ab
Z12	0.229	0.005	b
Z13	0.234	0.012	ab
Z23	0.247	0.005	ab
Z123	0.259	0.025	a
CK	0.187	0.007	c
initial data	/
	Organic Matter（g/kg）
	65.602	0.993	b
	60.578	2.854	cd
	58.356	1.311	d
	64.769	2.795	bc
	70.803	4.602	a
	62.759	0.912	bcd
	74.136	3.23	a
	53.751	1.025	e
NO.	pH
Z1	7.753	0.025	ab
Z2	7.703	0.012	ab
Z3	7.68	0.04	b
Z12	7.687	0.042	ab
Z13	7.607	0.04	c
Z23	7.763	0.035	a
Z123	7.753	0.055	ab
CK	7.507	0.07	d
初始	7.033	0.015	e
	Rapidly Available Phosphorus（mg/kg）
	68.628	0.985	d
	73.783	8.239	cd
	68.859	5.849	d
	68.061	2.019	d
	80.876	6.807	c
1.0868	93.55	8.65	b
0.70852	114.263	2.428	a
	54.755	1.36	e
	50.167	2.471	e
	Rapidly Available Potassium（mg/kg）
	499.188	10.579	a
	396.846	7.017	d
	437.041	6.272	bc
1.29492	448.568	9.09	b
	504.082	7.74	a
1.27264	375.606	5.396	e
	420.658	21.456	c
	395.788	8.753	d
	219.651	8.162	f

[truncated: 1 more sheets: Organic Phosphorus Forms]
