# Supplementary material for: Effects of phosphorus-solubilizing fungi on bulb quality and the Fritillaria taipaiensis rhizosphere soil environment
Source: PeerJ. 2025 Apr 21;13:e19283. doi: 10.7717/peerj.19283 (PMC12020734; doi:10.7717/peerj.19283)
Supplement: Supplemental Information 2 [file peerj-13-19283-s002.xls]

## Sheet: total alkaloids of F. taipaiens
Calibration Curve							total alkaloids of F. taipaiensis bulbs
concentration（μg/ml）	absorbance					Z1	0.0817%±0.0001e
2.055	0.113					Z2	0.0659%±0.0007g
8.218	0.357					Z3	0.1140%±0.0015a
12.328	0.557					Z12	0.1035%±0.0007b
20.546	0.848					Z13	0.0946%±0.0008c
Equation of the Curve						Z23	0.0768%±0.0015f
Y=0.0400377X+0.0367358						Z123	0.0890%±0.0023d
R2=0.99670						CK	0.0620%±0.0004h
R=0.99835
Weigh 1.0g of the sample powder, process it according to the regulations, place it in a 50ml volumetric flask, accurately measure 2.00ml and evaporate it in a water bath, then accurately add 10ml of chloroform, and process it according to the regulations.
Sample Number: Z1					Concentration Value
Moisture:		0.097			（μg/ml）					Z1	Z2	Z3	Z12	Z13	Z23	Z123
① Sample Weight (g)	1.0155	Content	0.000816797		2.996					1.0155	1.0125	1.0026	1.0015	1.0066	1.0014	1.0029
② Sample Weight	1.0142	Content	0.000817298		2.994					1.0142	1.0139	1.0105	1.0037	1.0185	1.0137	1.0175
③ Sample Weight	1.0133	Content	0.000817477		2.992					1.0133	1.0207	1.0008	1.0125	1.0007	1.0009	1.0006
④ Sample Weight	1.0158	Content	0.000815466		2.992					1.0158	1.0341	1.0036	1.0068	1.0162	1.0257	1.0714
⑤ Sample Weight	1.0124	Content	0.000819298		2.996					1.0124	1.0129	1.0155	1.0172	1.0041	1.0173	1.0257
Average Value			0.000817267
Sample Number: Z2					Concentration Value
Moisture:		8.5%			（μg/ml）
① Sample Weight (g)	1.0125	Content	0.000663563		2.459
② Sample Weight	1.0139	Content	0.000664533		2.466
③ Sample Weight	1.0207	Content	0.000656626		2.453
④ Sample Weight	1.0341	Content	0.000647589		2.451
⑤ Sample Weight	1.0129	Content	0.000661953		2.454
Average Value			0.000658853
Sample Number: Z3					Concentration Value
Moisture:		9.1%			（μg/ml）
① Sample Weight (g)	1.0026	Content	0.00112222		4.091
② Sample Weight	1.0105	Content	0.00112705		4.141
③ Sample Weight	1.0008	Content	0.00115419		4.2
④ Sample Weight	1.0036	Content	0.00115426		4.212
⑤ Sample Weight	1.0155	Content	0.00114426		4.225
Average Value			0.0011404
Sample Number: Z12					Concentration Value
Moisture:		8.3%			（μg/ml）
① Sample Weight (g)	1.0015	Content	0.00104206		3.828
② Sample Weight	1.0037	Content	0.0010395		3.827
③ Sample Weight	1.0125	Content	0.00103181		3.832
④ Sample Weight	1.0068	Content	0.0010363		3.827
⑤ Sample Weight	1.0172	Content	0.00102544		3.826
Average Value			0.00103502
Sample Number: Z13					Concentration Value
Moisture:		9.5%			（μg/ml）
① Sample Weight (g)	1.0066	Content	0.00095173		3.468
② Sample Weight	1.0185	Content	0.00093627		3.452
③ Sample Weight	1.0007	Content	0.000954028		3.456
④ Sample Weight	1.0162	Content	0.000938117		3.451
⑤ Sample Weight	1.0041	Content	0.000951073		3.457
Average Value			0.000946244
Sample Number: Z23					Concentration Value
Moisture:		9.8%			（μg/ml）
① Sample Weight (g)	1.0014	Content	0.000791575		2.86
② Sample Weight	1.0137	Content	0.000767205		2.806
③ Sample Weight	1.0009	Content	0.000770371		2.782
④ Sample Weight	1.0257	Content	0.000753636		2.789
⑤ Sample Weight	1.0173	Content	0.000757952		2.782
Average Value			0.000768148
Sample Number: Z123					Concentration Value
Moisture:		9.0%			（μg/ml）
① Sample Weight (g)	1.0029	Content	0.000902433		3.584
② Sample Weight	1.0175	Content	0.000895193		3.607
③ Sample Weight	1.0006	Content	0.000910565		3.608
④ Sample Weight	1.0714	Content	0.000850864		3.61
⑤ Sample Weight	1.0257	Content	0.000890744		3.618
Average Value			0.00088996
	CK
① Sample Weight (g)	1.009	Content	0.000612267		2.4464
② Sample Weight	1.0005	Content	0.000622795		2.4675
③ Sample Weight	1.0006	Content	0.000621925		2.4643
④ Sample Weight	1.0003	Content	0.000621707		2.4627
⑤ Sample Weight	1.0005	Content	0.000618908		2.4521
Average Value			0.00061952
