# Supplementary material for: Effects of phosphorus-solubilizing fungi on bulb quality and the Fritillaria taipaiensis rhizosphere soil environment
Source: PeerJ. 2025 Apr 21;13:e19283. doi: 10.7717/peerj.19283 (PMC12020734; doi:10.7717/peerj.19283)
Supplement: Supplemental Information 3 [file peerj-13-19283-s003.xlsx]

## Sheet: Sheet2
	Fritillaria Peimine (ug/g)	Fritillaria Peiminine (ug/g)	Fritillaria Peimisine (μg/g)	West Fritillaria Alkaloid (μg/g)	West Fritillaria Alkaloid Glycoside (μg/g)
Z1-1	29.0034	32.7245	377.866	3.29437	1.29776		Z2-CK
Z1-2	30.9886	37.0414	413.503	3.45484	1.32622		Z2-Z13
Z1-3	22.7995	27.1911	322.673	2.5291	1.02289
Z2-1	26.8835	28.1898	311.49	3.87139	1.21073
Z2-2	31.4925	32.677	375.955	4.67872	1.41315
Z2-3	30.4338	31.0296	371.633	4.5727	1.313
Z3-1	35.8444	52.0014	432.249	5.89126	1.28152
Z3-2	26.2378	38.9246	352.632	4.6827	0.931256
Z3-3	27.1202	41.6406	356.461	5.00648	0.976509
Z12-1	23.2253	36.9015	336.748	4.23573	1.54128
Z12-2	23.4919	36.6558	328.214	3.9084	1.32909
Z12-3	23.0037	35.5984	324.965	4.02827	1.36663
Z13-1	26.2013	39.7774	385.137	5.02833	1.0583
Z13-2	27.343	37.7821	398.094	5.21845	1.05322
Z13-3	29.1578	42.7647	401.016	5.48937	1.11312
Z23-1	28.5549	43.3446	379.314	3.25533	1.41515
Z23-2	27.1142	42.1421	368.581	3.20723	1.39656
Z23-3	27.051	41.2546	341.864	3.4492	1.43445
Z123-1	37.6481	37.161	372.045	4.29665	1.19245
Z123-2	39.5548	36.5814	371.825	4.34033	1.14353
Z123-3	39.2025	37.8066	382.077	4.25137	1.20729
ZCK-1	16.8513	38.311	306.03	2.21903	0.825461
ZCK-2	20.0094	43.1446	382.004	2.82131	1.05159
ZCK-3	20.9057	44.3237	367.923	2.77962	1.02641
Fritillaria Peimine (ug/g)
Descriptions
VAR00002
	Case Number	Mean	Standard Deviation	Standard Error	95% Confidence Interval for the Mean		Minimum Value	Maximum Value
					Lower Limit	Upper Limit				Fritillaria Peimine (ug/g)
1	3	27.5973	4.27163	2.46623	16.986	38.2087	22.8	30.99		27.597±4.272bc
2	3	29.6037	2.41409	1.39377	23.6067	35.6006	26.88	31.49		29.604±2.414b
3	3	29.734	5.30976	3.06559	16.5438	42.9242	26.24	35.84		29.734±5.310b
4	3	23.2403	0.24436	0.14108	22.6333	23.8474	23	23.49		23.240±0.244cd
5	3	27.5673	1.49121	0.86095	23.863	31.2717	26.2	29.16		27.567±1.491bc
6	3	27.5733	0.85073	0.49117	25.46	29.6867	27.05	28.56		27.573±0.851bc
7	3	38.8017	1.01457	0.58577	36.2813	41.322	37.65	39.56		38.802±1.015a
8	3	19.2553	2.12997	1.22974	13.9642	24.5465	16.85	20.91		19.255±2.130d
Total	24	27.9216	5.85054	1.19424	25.4512	30.3921	16.85	39.56
	1	3		27.5973	27.5973		bc
Duncan's new multiple range test	2	3			29.6037		b
	3	3			29.734		b
	4	3	23.2403	23.2403			cd
	5	3		27.5673	27.5673		bc
	6	3		27.5733	27.5733		bc
	7	3				38.8017	a
	8	3	19.2553				d
	VAR00001	Case Number	Alpha's subset = 0.05
	statistically significant		0.096	0.093	0.397	1
VAR00002
			1	2	3	4
Will display the average values of each group in the homogeneous subset.
a Using harmonic mean sample size = 3.000.
Fritillaria Peiminine
Descriptions
VAR00002
	Case Number	Mean	Standard Deviation	Standard Error	95% Confidence Interval for the Mean		Minimum Value	Maximum Value
					Lower Limit	Upper Limit				Fritillaria Peiminine
1	3	32.319	4.93754	2.85069	20.0535	44.5845	27.19	37.04		32.319±4.938cd
2	3	30.6323	2.26978	1.31046	24.9939	36.2708	28.19	32.68		30.632±2.270d
3	3	44.189	6.90034	3.98391	27.0476	61.3304	38.92	52		44.189±6.900a
4	3	36.385	0.69248	0.39981	34.6648	38.1052	35.6	36.9		36.385±0.692bcd
5	3	40.108	2.50794	1.44796	33.8779	46.3381	37.78	42.77		40.108±2.508ab
6	3	42.2473	1.04897	0.60563	39.6415	44.8531	41.26	43.35		42.247±1.049ab
7	3	37.183	0.6133	0.35409	35.6595	38.7065	36.58	37.81		37.183±0.613bc
8	3	41.9267	3.18627	1.83959	34.0115	49.8418	38.31	44.32		41.927±3.186ab
Total	24	38.1238	5.47259	1.11709	35.8129	40.4347	27.19	52
	1	3	32.319	32.319			cd
	2	3	30.6323				d
	3	3				44.189	a
	4	3	36.385	36.385	36.385		bcd
Duncan's new multiple range test	5	3			40.108	40.108	ab
	6	3			42.2473	42.2473	ab
	7	3		37.183	37.183		bc
	8	3			41.9267	41.9267	ab
	VAR00001	Case Number	Alpha's subset = 0.05
	statistically significant		0.07	0.121	0.078	0.201
VAR00002
			1	2	3	4
Will display the average values of each group in the homogeneous subset.
a Using harmonic mean sample size = 3.000.
Fritillaria Peimisine (μg/g)
Descriptions
VAR00002
	Case Number	Mean	Standard Deviation	Standard Error	95% Confidence Interval for the Mean		Minimum Value	Maximum Value
					Lower Limit	Upper Limit				Fritillaria Peimisine (μg/g)
1	3	371.347	45.7645	26.4222	257.662	485.033	322.67	413.5		371.347±45.765ab
2	3	353.026	36.0361	20.8054	263.507	442.545	311.49	375.96		353.026±36.036ab
3	3	380.447	44.9024	25.9244	268.904	491.991	352.63	432.25		380.447±44.902ab
4	3	329.976	6.08583	3.51366	314.858	345.094	324.96	336.75		329.976±6.086b
5	3	394.749	8.45147	4.87946	373.754	415.744	385.14	401.02		394.749±8.451a
6	3	363.253	19.2851	11.1343	315.346	411.16	341.86	379.31		363.253±19.285ab
7	3	375.316	5.85652	3.38126	360.767	389.864	371.83	382.08		375.316±5.857ab
8	3	351.986	40.4167	23.3346	251.585	452.386	306.03	382		351.986±40.417ab
Total	24	365.012	32.0009	6.53215	351.5	378.525	306.03	432.25
	1	3	371.347	371.347	ab
	2	3	353.026	353.026	ab
	3	3	380.447	380.447	ab
Duncan's new multiple range test	4	3	329.976		b
	5	3		394.749	a
	6	3	363.253	363.253	ab
	7	3	375.316	375.316	ab
	8	3	351.986	351.986	ab
	VAR00001	Case Number	Alpha's subset = 0.05
	statistically significant		0.093	0.15
VAR00002
			1	2
Will display the average values of each group in the homogeneous subset.
a Using harmonic mean sample size = 3.000.
West Fritillaria Alkaloid
Descriptions
VAR00002
	Case Number	Mean	Standard Deviation	Standard Error	95% Confidence Interval for the Mean		Minimum Value	Maximum Value
					Lower Limit	Upper Limit				West Fritillaria Alkaloid
1	3	3.0927	0.49474	0.28564	1.8637	4.3217	2.53	3.46		3.093±0.495cd
2	3	4.3743	0.43911	0.25352	3.2835	5.4651	3.87	4.68		4.374±0.439b
3	3	5.1933	0.62541	0.36108	3.6397	6.7469	4.68	5.89		5.193±0.625a
4	3	4.0573	0.16596	0.09581	3.6451	4.4696	3.91	4.24		4.057±0.166b
5	3	5.245	0.23168	0.13376	4.6695	5.8205	5.03	5.49		5.245±0.232a
6	3	3.3037	0.12813	0.07398	2.9854	3.622	3.21	3.45		3.304±0.128c
7	3	4.296	0.04451	0.0257	4.1854	4.4066	4.25	4.34		4.296±0.045b
8	3	2.6067	0.33635	0.19419	1.7711	3.4422	2.22	2.82		2.607±0.336d
Total	24	4.0211	0.9654	0.19706	3.6135	4.4288	2.22	5.89
	1	3	3.0927	3.0927			cd
Duncan's new multiple range test	2	3			4.3743		b
	3	3				5.1933	a
	4	3			4.0573		b
	5	3				5.245	a
	6	3		3.3037			c
	7	3			4.296		b
	8	3	2.6067				d
	VAR00001	Case Number	Alpha's subset = 0.05
	statistically significant		0.118	0.484	0.323	0.863
VAR00002
			1	2	3	4
Will display the average values of each group in the homogeneous subset.
a Using harmonic mean sample size = 3.000.
West Fritillaria Alkaloid (μg/g)
Descriptions
VAR00002
	Case Number	Mean	Standard Deviation	Standard Error	95% Confidence Interval for the Mean		Minimum Value	Maximum Value
					Lower Limit	Upper Limit				West Fritillaria Alkaloid (μg/g)
1	3	1.2157	0.16744	0.09667	0.7997	1.6316	1.02	1.33		1.216±0.167abc
2	3	1.3123	0.101	0.05831	1.0614	1.5632	1.21	1.41		1.312±0.101ab
3	3	1.0633	0.19076	0.11014	0.5895	1.5372	0.93	1.28		1.063±0.191cd
4	3	1.4123	0.11304	0.06526	1.1315	1.6931	1.33	1.54		1.412±0.113a
5	3	1.0747	0.03329	0.01922	0.992	1.1574	1.05	1.11		1.075±0.033cd
6	3	1.4153	0.0185	0.01068	1.3694	1.4613	1.4	1.43		1.415±0.018a
7	3	1.181	0.03291	0.019	1.0992	1.2628	1.14	1.21		1.181±0.033bcd
8	3	0.9677	0.12423	0.07173	0.659	1.2763	0.83	1.05		0.968±0.124d
Total	24	1.2053	0.18524	0.03781	1.1271	1.2835	0.83	1.54
	1	3		1.2157	1.2157	1.2157	abc
Duncan's new multiple range test	2	3			1.3123	1.3123	ab
	3	3	1.0633	1.0633			cd
	4	3				1.4123	a
	5	3	1.0747	1.0747			cd
	6	3				1.4153	a
	7	3	1.181	1.181	1.181		bcd
	8	3	0.9677				d
	VAR00001	Case Number	Alpha's subset = 0.05
	statistically significant		0.051	0.153	0.202	0.066
VAR00002
			1	2	3	4
Will display the average values of each group in the homogeneous subset.
a Using harmonic mean sample size = 3.000.

## Sheet: Sheet3
No.	Fritillaria Peimine (ug/g)	Fritillaria Peiminine (ug/g)	Fritillaria Peimisine (μg/g)	West Fritillaria Alkaloid (μg/g)	West Fritillaria Alkaloid Glycoside (μg/g)
Z1	27.597±4.272bc	32.319±4.938cd	371.347±45.765ab	3.093±0.495cd	1.216±0.167abc
Z2	29.604±2.414b	30.632±2.270d	353.026±36.036ab	4.374±0.439b	1.312±0.101ab
Z3	29.734±5.310b	44.189±6.900a	380.447±44.902ab	5.193±0.625a	1.063±0.191cd
Z12	23.240±0.244cd	36.385±0.692bcd	329.976±6.086b	4.057±0.166b	1.412±0.113a
Z13	27.567±1.491bc	40.108±2.508ab	394.749±8.451a	5.245±0.232a	1.075±0.033cd
Z23	27.573±0.851bc	42.247±1.049ab	363.253±19.285ab	3.304±0.128c	1.415±0.018a
Z123	38.802±1.015a	37.183±0.613bc	375.316±5.857ab	4.296±0.045b	1.181±0.033bcd
CK	19.255±2.130d	41.927±3.186ab	351.986±40.417ab	2.607±0.336d	0.968±0.124d
No.	Fritillaria Peimine (ug/g)	Fritillaria Peiminine (ug/g)	Fritillaria Peimisine (μg/g)	West Fritillaria Alkaloid (μg/g)	West Fritillaria Alkaloid Glycoside (μg/g)
Z1	27.5973	32.319	371.347	3.0927	1.2157	435.572	435.572
Z2	29.6037	30.6323	353.026	4.3743	1.3123	418.949	418.949
Z3	29.734	44.189	380.447	5.1933	1.0633	460.627	460.627	0.105304
Z12	23.2403	36.385	329.976	4.0573	1.4123	395.071	395.071
Z13	27.5673	40.108	394.749	5.245	1.0747	468.744	468.744	0.124782
Z23	27.5733	42.2473	363.253	3.3037	1.4153	437.793	437.793
Z123	38.8017	37.183	375.316	4.296	1.181	456.777	456.777	0.0960673
CK	19.2553	41.9267	351.986	2.6067	0.9677	416.742	416.742
	1.01512			0.992289	0.45944
				1.01212	0.46254
